# Supplementary material for: Cholinium-Based Ionic Liquids as Promising Antimicrobial Agents in Pharmaceutical Applications: Surface Activity, Antibacterial Activity and Ecotoxicological Profile
Source: MDPI journal article supplement (doi:10.3390/pharmaceutics15071806), 2023-06-24
Supplement: s1 [file s1]

# Supplementary Materials: Cholinium-Based Ionic Liquids as Promising Antimicrobial Agents in Pharmaceutical Applications: Surface Activity, Antibacterial Activity and Ecotoxicological Profile

María Teresa García, Elena Bautista, Ana de la Fuente and Lourdes Pérez

## Synthesis Section

### Materials

1-bromodecane (98%), 1-bromododecane (97%), 1-bromotetradecane (97%), 1-bromohexadecane (97%), 2-dimethylaminoethanol ( $\geq 99.5\%$ ) were purchased from Sigma–Aldrich (Darmstadt, Germany). All other chemicals used were of reagent grade. Organic solvents were reagent grade and used without further purification. Deuterated methanol was purchased from Euriso-Top. Water from a Milli-Q Millipore system with electrical resistivity of 18.2 M $\Omega$ /cm was used to prepare all aqueous solutions.

### Synthesis of Cholinium-based Ionic Liquids

General procedure [27]: Alkyl(2-hydroxyethyl)dimethylammonium bromide salts were synthesized by mixing 0.05 mol of 2-dimethylethanolamine with 0.055 mol of the corresponding 1-bromoalkane. 30 mL of 10:1 *v/v* acetonitrile/methanol was added to ensure complete miscibility of all starting materials. The mixture was heated at 60 °C and stirred for 30 min. The solvents were evaporated, and the obtained solid product was dissolved in ethyl acetate and cooled. Subsequently, the solid phase was filtered off, and washed two times more with ethyl acetate and a portion of ethyl acetate was added. The obtained bromides were dried under reduced pressure at 40 °C for 48 h and stored over P<sub>4</sub>O<sub>10</sub>.

### Analytical data and spectra assignments.

<sup>1</sup>H and <sup>13</sup>C NMR spectra of the purified products were recorded in CD<sub>3</sub>OD (Euriso-Top, Cambridge, UK) on a Varian spectrometer (Palo Alto, California, US) at 400 MHz (<sup>1</sup>H) and 101 MHz (<sup>13</sup>C). HRMS identification of the compounds was performed on an Acquity UPLC System and a LCT Premier™ XE Benchtop orthogonal acceleration TOF (Waters Corporation, Milford, Massachusetts, US) with an electrospray ionization source. Data were processed using MassLynx software (v 4.1). Elemental analysis (CHN) of the final compounds was determined with a FlashSmart™ Elemental Analyzer A8 (Thermo Fisher Scientific, Waltham, Massachusetts, US), whereas Br was analyzed by potentiometric titration with AgNO<sub>3</sub> with a Metrohm 808 Titrator.

*Decyl(2-hydroxyethyl)dimethylammonium bromide*. [C<sub>10</sub>CholBr] was obtained as a white solid. Yield: 73 93%. <sup>1</sup>H NMR (400 MHz, CD<sub>3</sub>OD)  $\delta$ : 0.89 (t, 3H, CH<sub>3</sub>(CH<sub>2</sub>)<sub>7</sub>CH<sub>2</sub>CH<sub>2</sub>N<sup>+</sup>); 1.31 (m, 14H, CH<sub>3</sub>(CH<sub>2</sub>)<sub>7</sub>CH<sub>2</sub>CH<sub>2</sub>N<sup>+</sup>); 1.80 (m, 2H, CH<sub>3</sub>(CH<sub>2</sub>)<sub>7</sub>CH<sub>2</sub>CH<sub>2</sub>N<sup>+</sup>); 3.17 (s, 6H, (CH<sub>3</sub>)<sub>2</sub>N<sup>+</sup>); 3.41 (m, 2H, CH<sub>3</sub>(CH<sub>2</sub>)<sub>7</sub>CH<sub>2</sub>CH<sub>2</sub>N<sup>+</sup>); 3.48 (m, 2H, N<sup>+</sup>CH<sub>2</sub>CH<sub>2</sub>OH); 3.99 (m, 2H, N<sup>+</sup>CH<sub>2</sub>CH<sub>2</sub>OH). <sup>13</sup>C NMR (101 MHz, CD<sub>3</sub>OD)  $\delta$ : 14.42, 23.65, 23.71, 27.40, 30.22, 30.40, 30.55, 33.03, 52.17, 52.21, 52.24, 56.88, 66.51, 66.82. Anal. calcd. for C<sub>14</sub>H<sub>32</sub>BrNO: C, 54.2; H, 10.4; N, 4.5; Br, 25.8; Found: C, 52.0; H, 10.4; N, 4.2; Br, 26.1 Found: C, 54.0; H, 10.4; N, 4.4; Br, 25.9. ESI-MS [C<sub>10</sub>Chol<sup>+</sup>]: *m/z* 230.3.

*Dodecyl(2-hydroxyethyl)dimethylammonium bromide*. [C<sub>12</sub>CholBr] was obtained as a white solid. Yield: 57 87%. <sup>1</sup>H NMR (400 MHz, CD<sub>3</sub>OD)  $\delta$ : 0.90 (t, 3H, CH<sub>3</sub>(CH<sub>2</sub>)<sub>9</sub>CH<sub>2</sub>CH<sub>2</sub>N<sup>+</sup>); 1.31–1.38 (m, 18H, CH<sub>3</sub>(CH<sub>2</sub>)<sub>9</sub>CH<sub>2</sub>CH<sub>2</sub>N<sup>+</sup>); 1.80 (m, 2H, CH<sub>3</sub>(CH<sub>2</sub>)<sub>9</sub>CH<sub>2</sub>CH<sub>2</sub>N<sup>+</sup>); 3.17 (s, 6H,

( $\text{CH}_3$ )<sub>2</sub>N<sup>+</sup>); 3.41 (m, 2H,  $\text{CH}_3(\text{CH}_2)_9\text{CH}_2\text{CH}_2\text{N}^+$ ); 3.48 (m, 2H,  $\text{N}^+\text{CH}_2\text{CH}_2\text{OH}$ ); 3.99 (m, 2H,  $\text{N}^+\text{CH}_2\text{CH}_2\text{OH}$ ). <sup>13</sup>C NMR (101 MHz, MeOD)  $\delta$  14.43, 23.65, 23.73, 27.40, 30.22, 30.46, 30.54, 30.63, 30.73, 33.06, 52.17, 52.23, 52.25, 56.88, 66.50, 66.82. Anal. calcd. for  $\text{C}_{16}\text{H}_{36}\text{BrNO}$ : C, 56.8; H, 10.7; N, 4.1; Br, 23.6; Found: C, 56.9; H, 10.6; N, 4.1; Br, 23.7. ESI-MS [ $\text{C}_{12}\text{Chol}^+$ ]:  $m/z$  258.3.

*Tetradecyl(2-hydroethyl)dimethylammonium bromide*. [ $\text{C}_{14}\text{CholBr}$ ] was obtained as a white solid. Yield: 78 48%. <sup>1</sup>H NMR (400 MHz,  $\text{CD}_3\text{OD}$ )  $\delta$ : 0.90 (t, 3H,  $\text{CH}_3(\text{CH}_2)_{11}\text{CH}_2\text{CH}_2\text{N}^+$ ); 1.30–1.37 (m, 22H,  $\text{CH}_3(\text{CH}_2)_{11}\text{CH}_2\text{CH}_2\text{N}^+$ ); 1.80 (m, 2H,  $\text{CH}_3(\text{CH}_2)_{11}\text{CH}_2\text{CH}_2\text{N}^+$ ); 3.16 (s, 6H, ( $\text{CH}_3$ )<sub>2</sub>N<sup>+</sup>); 3.41 (m, 2H,  $\text{CH}_3(\text{CH}_2)_{11}\text{CH}_2\text{CH}_2\text{N}^+$ ); 3.48 (m, 2H,  $\text{N}^+\text{CH}_2\text{CH}_2\text{OH}$ ); 3.99 (m, 2H,  $\text{N}^+\text{CH}_2\text{CH}_2\text{OH}$ ). <sup>13</sup>C NMR (101 MHz, MeOD)  $\delta$  14.43, 23.65, 23.73, 27.41, 30.22, 30.47, 30.55, 30.63, 30.72, 30.75, 30.77, 30.79, 33.07, 52.16, 52.20, 56.88, 66.50, 66.83. Anal. calcd. for  $\text{C}_{18}\text{H}_{40}\text{BrNO}$ : C, 59.0; H, 11.0; N, 3.8; Br, 21.8; Found: C, 58.9; H, 11.0; N, 3.7; Br, 21.9. ESI-MS [ $\text{C}_{14}\text{Chol}^+$ ]:  $m/z$  286.3.

*Hexadecyl(2-hydroethyl)dimethylammonium bromide*. [ $\text{C}_{16}\text{CholBr}$ ] was obtained as a white solid. Yield: 75 45%. <sup>1</sup>H NMR (400 MHz,  $\text{CD}_3\text{OD}$ )  $\delta$ : 0.90 (t, 3H,  $\text{CH}_3(\text{CH}_2)_{13}\text{CH}_2\text{CH}_2\text{N}^+$ ); 1.19–1.38 (m, 26H,  $\text{CH}_3(\text{CH}_2)_{13}\text{CH}_2\text{CH}_2\text{N}^+$ ); 1.80 (m, 2H,  $\text{CH}_3(\text{CH}_2)_{13}\text{CH}_2\text{CH}_2\text{N}^+$ ); 3.16 (s, 6H, ( $\text{CH}_3$ )<sub>2</sub>N<sup>+</sup>); 3.41 (m, 2H,  $\text{CH}_3(\text{CH}_2)_{13}\text{CH}_2\text{CH}_2\text{N}^+$ ); 3.48 (m, 2H,  $\text{N}^+\text{CH}_2\text{CH}_2\text{OH}$ ); 3.99 (m, 2H,  $\text{N}^+\text{CH}_2\text{CH}_2\text{OH}$ ). <sup>13</sup>C NMR (101 MHz, MeOD)  $\delta$  14.44, 23.65, 23.73, 27.41, 30.23, 30.47, 30.55, 30.64, 30.73, 30.76, 30.78, 30.80, 33.07, 52.20, 56.88, 66.50, 66.83. Anal. calcd. for  $\text{C}_{20}\text{H}_{44}\text{BrNO}$ : C, 60.9; H, 11.2; N, 3.6; Br, 20.3; Found: C, 60.9; H, 11.3; N, 3.4; Br, 20.3. ESI-MS [ $\text{C}_{16}\text{Chol}^+$ ]:  $m/z$  314.3.

## THERMAL STABILITY

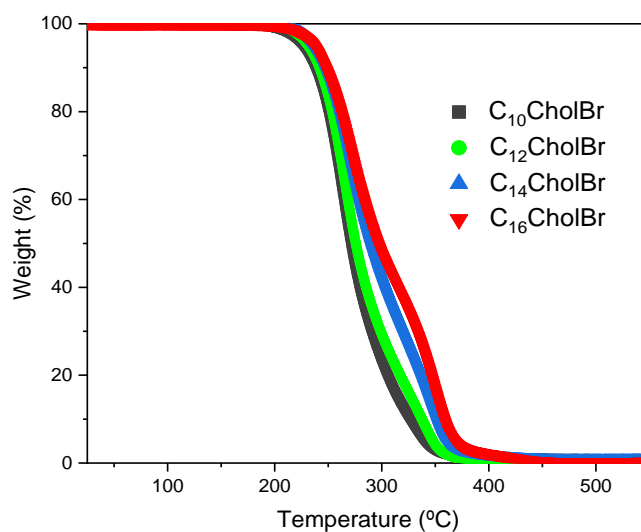

**Figure S1.** Decomposition curves determined by TGA for  $\text{C}_n\text{CholBr}$ .

## Cmc by conductivity measurements

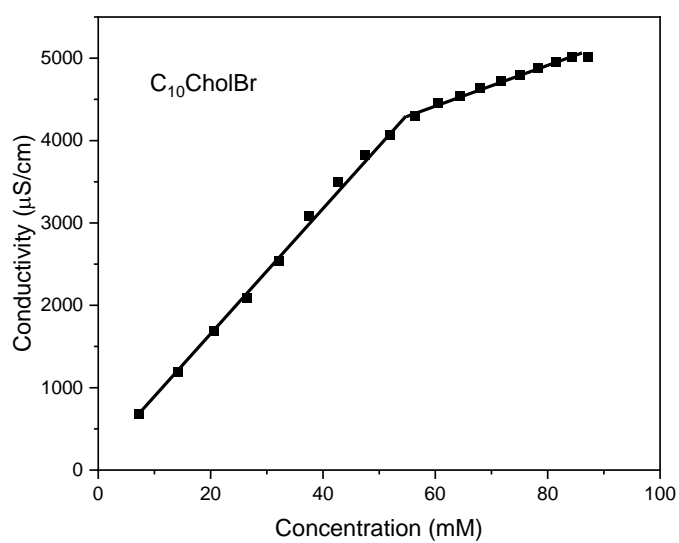

**Figure S2.** Specific conductivity versus concentration curve for  $C_{10}CholBr$ .

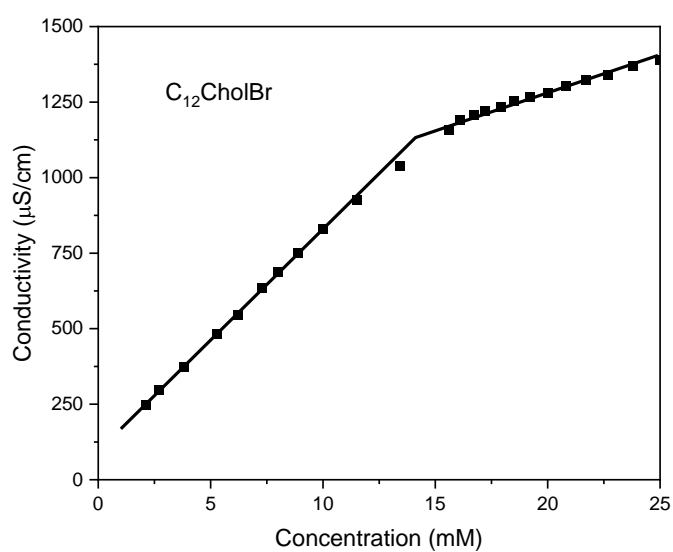

**Figure S3.** Specific conductivity versus concentration curve for  $C_{12}CholBr$ .

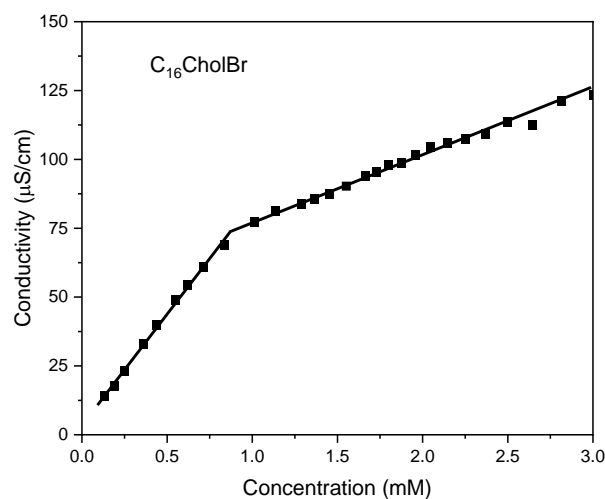

**Figure S4.** Specific conductivity versus concentration curve for C<sub>16</sub>CholBr.

### DLS measurements

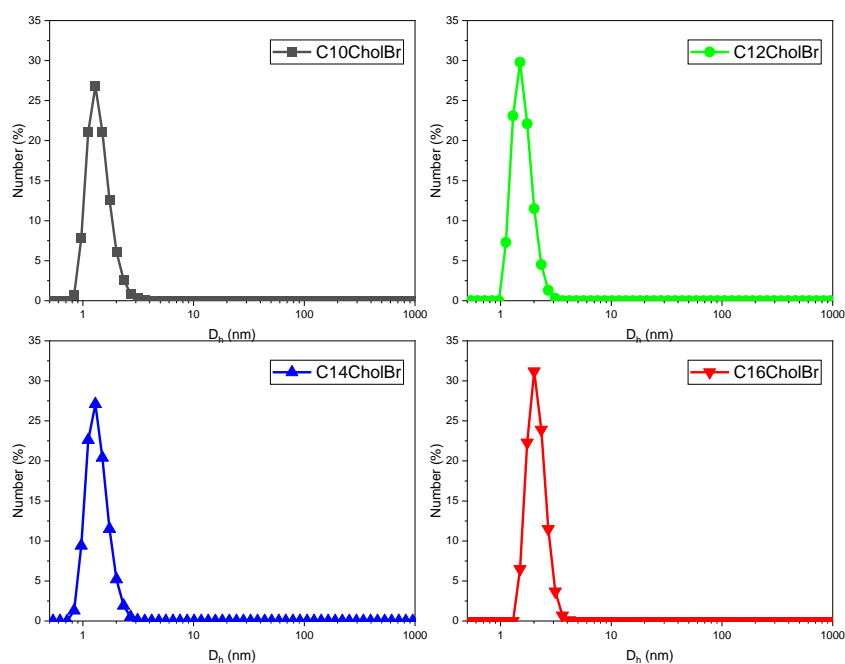

**Figure S5.** Number size distribution profiles for aggregates of cholinium-based ILs.

**Table S1.** Cconductivity measurements for C10CholBr.

| Concentration (mM) | $\sigma$ ( $\mu\text{S}/\text{cm}$ ) |
|--------------------|--------------------------------------|
| 7,3                | 680                                  |
| 14,1               | 1190                                 |
| 20,5               | 1693                                 |
| 26,5               | 2093                                 |
| 32,1               | 2543                                 |
| 37,5               | 3080                                 |
| 42,6               | 3500                                 |

|      |      |
|------|------|
| 47,4 | 3830 |
| 51,9 | 4070 |
| 56,3 | 4300 |
| 60,4 | 4460 |
| 64,3 | 4540 |
| 68   | 4640 |
| 71,6 | 4730 |
| 75   | 4800 |
| 78,3 | 4880 |
| 81,4 | 4950 |
| 84,4 | 5010 |
| 87,2 | 5020 |

**Table S2.** Conductivity measurements for C12CholBr.

| Concentration (mM) | $\sigma$ ( $\mu\text{S}/\text{cm}$ ) |
|--------------------|--------------------------------------|
| 25,0               | 1391                                 |
| 23,8               | 1369                                 |
| 22,7               | 1341                                 |
| 21,7               | 1324                                 |
| 20,8               | 1302                                 |
| 20,0               | 1280                                 |
| 19,2               | 1268                                 |
| 18,5               | 1253                                 |
| 17,9               | 1234                                 |
| 17,2               | 1220                                 |
| 16,7               | 1206                                 |
| 16,1               | 1190                                 |
| 15,6               | 1159                                 |
| 13,4               | 1040                                 |
| 11,5               | 925                                  |
| 10,0               | 829                                  |
| 8,9                | 750                                  |
| 8,0                | 688                                  |
| 7,3                | 634                                  |
| 6,2                | 544                                  |
| 5,3                | 481                                  |
| 3,8                | 372                                  |
| 2,7                | 297                                  |
| 2,1                | 248                                  |

**Table S3.** Conductivity measurements for C14CholBr.

| Concentration (mM) | $\sigma$ ( $\mu\text{S}/\text{cm}$ ) |
|--------------------|--------------------------------------|
| 15,0               | 527                                  |
| 14,1               | 506                                  |
| 13,2               | 495                                  |
| 12,5               | 480                                  |
| 11,8               | 467                                  |
| 11,3               | 451                                  |
| 10,7               | 443                                  |
| 10,2               | 440                                  |
| 9,8                | 420                                  |
| 9,4                | 411                                  |
| 9,0                | 407                                  |
| 8,7                | 399                                  |
| 8,3                | 394                                  |
| 7,8                | 382                                  |
| 7,3                | 371                                  |
| 6,8                | 362                                  |
| 6,12               | 350                                  |
| 5,56               | 336                                  |
| 5,1                | 328                                  |
| 4,37               | 312                                  |
| 3,83               | 296                                  |

|      |      |
|------|------|
| 3,09 | 263  |
| 2,6  | 224  |
| 2,24 | 192  |
| 1,97 | 172  |
| 1,27 | 114  |
| 0,93 | 83,8 |
| 0,42 | 38,3 |
| 0,27 | 24,7 |
| 0,20 | 18,5 |

**Table S4.** Conductivity measurements for C16CholBr.

| Concentration (mM) | $\sigma$ ( $\mu\text{S}/\text{cm}$ ) |
|--------------------|--------------------------------------|
| 3,0                | 123,3                                |
| 2,81               | 121,1                                |
| 2,65               | 112,5                                |
| 2,5                | 113,7                                |
| 2,37               | 109,1                                |
| 2,25               | 107,5                                |
| 2,14               | 105,8                                |
| 2,05               | 104,5                                |
| 1,96               | 101,7                                |
| 1,88               | 98,6                                 |
| 1,8                | 97,8                                 |
| 1,73               | 95,4                                 |
| 1,67               | 94,1                                 |
| 1,55               | 90,3                                 |
| 1,45               | 87,4                                 |
| 1,36               | 85,7                                 |
| 1,29               | 83,8                                 |
| 1,13               | 81,2                                 |
| 1,02               | 77,3                                 |
| 0,84               | 69                                   |
| 0,71               | 60,9                                 |
| 0,62               | 54,3                                 |
| 0,55               | 48,9                                 |
| 0,44               | 39,8                                 |
| 0,36               | 32,9                                 |
| 0,25               | 23,26                                |
| 0,19               | 17,75                                |
| 0,13               | 14,24                                |

**Table S5.** Surface tension measurements for C10CholBr.

| Concentration (mM) | Surface Tension (mN/m) |
|--------------------|------------------------|
| 0                  | 72,8                   |
| 2,39               | 61,2                   |
| 4,74               | 57,9                   |
| 7,04               | 51,3                   |
| 9,30               | 44,7                   |
| 13,68              | 43,0                   |
| 17,90              | 37,5                   |
| 21,97              | 34,2                   |
| 29,68              | 32,0                   |
| 36,87              | 31,6                   |
| 45,19              | 32,4                   |
| 52,87              | 34,7                   |
| 66,55              | 40,8                   |
| 88,72              | 41,0                   |
| 105,91             | 41,0                   |

**Table S6.** Surface tension measurements for C12CholBr.

| Concentration (mM) | Surface Tension (mN/m) |
|--------------------|------------------------|
| 0                  | 72,8                   |

|       |      |
|-------|------|
| 0,73  | 58,8 |
| 1,45  | 56,4 |
| 2,15  | 52,4 |
| 2,84  | 48,5 |
| 4,18  | 45,8 |
| 5,47  | 44,0 |
| 6,72  | 41,4 |
| 9,07  | 38,3 |
| 13,82 | 38,3 |
| 16,16 | 38,7 |
| 20,34 | 39,0 |
| 27,12 | 38,8 |
| 32,38 | 38,8 |

**Table S7.** Surface tension measurements for C14CholBr.

| Concentration (mM) | Surface Tension (mN/m) |
|--------------------|------------------------|
| 0,00               | 72,5                   |
| 0,24               | 59,7                   |
| 0,48               | 53,0                   |
| 0,72               | 50,2                   |
| 0,94               | 43,7                   |
| 1,39               | 41,7                   |
| 1,82               | 40,7                   |
| 2,23               | 40,5                   |
| 3,02               | 37,2                   |
| 3,75               | 37,7                   |
| 4,59               | 37,9                   |
| 6,09               | 38,1                   |
| 8,51               | 37,9                   |
| 10,36              | 37,9                   |
| 11,84              | 38,0                   |

**Table S8.** Surface tension measurements for C16CholBr.

| Concentration (mM) | Surface Tension (mN/m) |
|--------------------|------------------------|
| 0                  | 72,3                   |
| 0,015              | 61,7                   |
| 0,031              | 59,5                   |
| 0,046              | 57,4                   |
| 0,076              | 48,7                   |
| 0,15               | 42,7                   |
| 0,30               | 38,4                   |
| 0,43               | 36,6                   |
| 0,70               | 37,4                   |
| 0,94               | 36,8                   |
| 1,22               | 37,1                   |
| 1,72               | 37,0                   |
| 2,52               | 37,1                   |
| 3,13               | 36,9                   |

**Table S9.** Fluorescence measurements for C10CholBr.

| Concentration (mM) | I <sub>i</sub> /I <sub>3</sub> |
|--------------------|--------------------------------|
| 0                  | 1,547                          |
| 4,3                | 1,559                          |
| 8,5                | 1,546                          |
| 12,6               | 1,536                          |
| 16,6               | 1,542                          |
| 20,4               | 1,551                          |
| 26,7               | 1,552                          |
| 32,7               | 1,547                          |
| 43,9               | 1,568                          |
| 49,2               | 1,532                          |
| 54,3               | 1,496                          |

|      |       |
|------|-------|
| 64,0 | 1,300 |
| 73,0 | 1,237 |
| 81,4 | 1,227 |
| 89,2 | 1,232 |
| 103  | 1,227 |
| 116  | 1,213 |
| 127  | 1,240 |

**Table S10.** Fluorescence measurements for C12CholBr.

| Concentration (mM) | I <sub>i</sub> /I <sub>3</sub> |
|--------------------|--------------------------------|
| 0                  | 1,548                          |
| 2,7                | 1,561                          |
| 4,0                | 1,553                          |
| 5,3                | 1,584                          |
| 7,1                | 1,545                          |
| 9,0                | 1,569                          |
| 11,3               | 1,528                          |
| 13,6               | 1,397                          |
| 16,4               | 1,263                          |
| 19,0               | 1,224                          |
| 21,6               | 1,209                          |
| 24,0               | 1,208                          |
| 33,0               | 1,214                          |
| 37,0               | 1,210                          |
| 45,9               | 1,196                          |

**Table S11.** Fluorescence measurements for C14CholBr.

| Concentration (mM) | I <sub>i</sub> /I <sub>3</sub> |
|--------------------|--------------------------------|
| 0                  | 1,596                          |
| 0,45               | 1,596                          |
| 0,89               | 1,603                          |
| 1,11               | 1,599                          |
| 1,54               | 1,606                          |
| 1,97               | 1,578                          |
| 2,59               | 1,602                          |
| 3,19               | 1,340                          |
| 3,78               | 1,235                          |
| 4,55               | 1,241                          |
| 5,47               | 1,225                          |
| 6,35               | 1,205                          |
| 7,20               | 1,220                          |
| 8,02               | 1,218                          |
| 8,80               | 1,203                          |
| 15,3               | 1,235                          |
| 16,4               | 1,221                          |
| 18,3               | 1,188                          |

**Table S12.** Fluorescence measurements for C16CholBr.

| Concentration (mM) | I <sub>i</sub> /I <sub>3</sub> |
|--------------------|--------------------------------|
| 0                  | 1,576                          |
| 0,05               | 1,572                          |
| 0,07               | 1,573                          |
| 0,09               | 1,580                          |
| 0,13               | 1,588                          |
| 0,18               | 1,575                          |
| 0,22               | 1,587                          |
| 0,32               | 1,568                          |
| 0,42               | 1,571                          |
| 0,61               | 1,483                          |
| 0,78               | 1,248                          |
| 1,08               | 1,231                          |
| 1,35               | 1,206                          |

|      |       |
|------|-------|
| 1,58 | 1,210 |
| 1,78 | 1,197 |
| 1,96 | 1,196 |

**Table S13.** DLS: Intensity size distribution of CnCholBr.

| Diameter (nm) | C10CholBr | C12CholBr | C14CholBr | C16CholBr |
|---------------|-----------|-----------|-----------|-----------|
| 0,4           | 0         | 0         | 0         | 0         |
| 0,4632        | 0         | 0         | 0         | 0         |
| 0,5365        | 0         | 0         | 0         | 0         |
| 0,6213        | 0         | 0         | 0         | 0         |
| 0,7195        | 0         | 0         | 0         | 0         |
| 0,8332        | 0         | 0         | 0         | 0         |
| 0,9649        | 0,1       | 0         | 0,2       | 0         |
| 1,117         | 2,4       | 0         | 2,4       | 0         |
| 1,294         | 6,5       | 4,1       | 6,3       | 0         |
| 1,499         | 11,3      | 11,3      | 10,4      | 0         |
| 1,736         | 15        | 17,8      | 13        | 1,2       |
| 2,01          | 16,5      | 19,9      | 13        | 4         |
| 2,328         | 15,5      | 16,6      | 10,3      | 6,2       |
| 2,696         | 12,2      | 9,7       | 6,1       | 6,1       |
| 3,122         | 7,8       | 3,1       | 2,1       | 3,6       |
| 3,615         | 3,7       | 0         | 0         | 0,9       |
| 4,187         | 0,9       | 0         | 0         | 0         |
| 4,849         | 0         | 0         | 0         | 0         |
| 5,615         | 0         | 0         | 0         | 0         |
| 6,503         | 0         | 0         | 0         | 0         |
| 7,531         | 0         | 0         | 0         | 0         |
| 8,721         | 0         | 0         | 0         | 0         |
| 10,1          | 0         | 0         | 0         | 0         |
| 11,7          | 0         | 0         | 0         | 0         |
| 13,54         | 0         | 0         | 0         | 0         |
| 15,69         | 0         | 0         | 0         | 0         |
| 18,17         | 0         | 0         | 0         | 0         |
| 21,04         | 0         | 0         | 0         | 0         |
| 24,36         | 0         | 0         | 0         | 0         |
| 28,21         | 0         | 0         | 0         | 0         |
| 32,67         | 0         | 0         | 0         | 0         |
| 37,84         | 0         | 0         | 0         | 0         |
| 43,82         | 0         | 0         | 0         | 0         |
| 50,75         | 0         | 0         | 0         | 0         |
| 58,77         | 0         | 0         | 0         | 0         |
| 68,06         | 0         | 0         | 0         | 0         |
| 78,82         | 0         | 0,1       | 0,3       | 0,6       |
| 91,28         | 0         | 0,9       | 1,5       | 2,7       |
| 105,7         | 0         | 2,3       | 3,4       | 6,3       |
| 122,4         | 0         | 3,4       | 5,3       | 10,4      |
| 141,8         | 0         | 3,9       | 6,5       | 13,7      |
| 164,2         | 0         | 3,4       | 6,7       | 14,8      |
| 190,1         | 0         | 2,3       | 5,7       | 13,3      |
| 220,2         | 0         | 1         | 4         | 9,6       |
| 255           | 0         | 0,2       | 2,1       | 5,1       |
| 295,3         | 0         | 0         | 0,6       | 1,4       |
| 342           | 0         | 0         | 0         | 0         |
| 396,1         | 0         | 0         | 0         | 0         |
| 458,7         | 0         | 0         | 0         | 0         |
| 531,2         | 0         | 0         | 0         | 0         |
| 615,1         | 0         | 0         | 0         | 0         |
| 712,4         | 0,1       | 0         | 0         | 0         |
| 825           | 0,1       | 0         | 0         | 0         |
| 955,4         | 0,2       | 0         | 0         | 0         |
| 1106          | 0,3       | 0         | 0         | 0         |
| 1281          | 0,4       | 0         | 0         | 0         |
| 1484          | 0,4       | 0         | 0         | 0         |
| 1718          | 0,5       | 0         | 0         | 0         |

|       |     |   |   |   |
|-------|-----|---|---|---|
| 1990  | 0,6 | 0 | 0 | 0 |
| 2305  | 0,6 | 0 | 0 | 0 |
| 2669  | 0,7 | 0 | 0 | 0 |
| 3091  | 0,8 | 0 | 0 | 0 |
| 3580  | 0,8 | 0 | 0 | 0 |
| 4145  | 0,8 | 0 | 0 | 0 |
| 4801  | 0,8 | 0 | 0 | 0 |
| 5560  | 0,8 | 0 | 0 | 0 |
| 6439  | 0   | 0 | 0 | 0 |
| 7456  | 0   | 0 | 0 | 0 |
| 8635  | 0   | 0 | 0 | 0 |
| 10000 | 0   | 0 | 0 | 0 |

**Table S14.** DLS: Number size distribution of CnCholBr.

| Diameter (nm) | C10CholBr | C12CholBr | C14CholBr | C16CholBr |
|---------------|-----------|-----------|-----------|-----------|
| 0,4           | 0         | 0         | 0         | 0         |
| 0,4632        | 0         | 0         | 0         | 0         |
| 0,5365        | 0         | 0         | 0         | 0         |
| 0,6213        | 0         | 0         | 0         | 0         |
| 0,7195        | 0         | 0         | 0         | 0         |
| 0,8332        | 0,7       | 0         | 1,3       | 0         |
| 0,9649        | 7,8       | 0         | 9,4       | 0         |
| 1,117         | 21,1      | 7,3       | 22,6      | 0         |
| 1,294         | 26,8      | 23,1      | 27,1      | 0         |
| 1,499         | 21,1      | 29,8      | 20,4      | 6,5       |
| 1,736         | 12,6      | 22,1      | 11,5      | 22,3      |
| 2,01          | 6,1       | 11,5      | 5,2       | 31,2      |
| 2,328         | 2,6       | 4,5       | 1,9       | 23,9      |
| 2,696         | 0,9       | 1,3       | 0,5       | 11,5      |
| 3,122         | 0,3       | 0,3       | 0,1       | 3,7       |
| 3,615         | 0,1       | 0         | 0         | 0,7       |
| 4,187         | 0         | 0         | 0         | 0,1       |
| 4,849         | 0         | 0         | 0         | 0         |
| 5,615         | 0         | 0         | 0         | 0         |
| 6,503         | 0         | 0         | 0         | 0         |
| 7,531         | 0         | 0         | 0         | 0         |
| 8,721         | 0         | 0         | 0         | 0         |
| 10,1          | 0         | 0         | 0         | 0         |
| 11,7          | 0         | 0         | 0         | 0         |
| 13,54         | 0         | 0         | 0         | 0         |
| 15,69         | 0         | 0         | 0         | 0         |
| 18,17         | 0         | 0         | 0         | 0         |
| 21,04         | 0         | 0         | 0         | 0         |
| 24,36         | 0         | 0         | 0         | 0         |
| 28,21         | 0         | 0         | 0         | 0         |
| 32,67         | 0         | 0         | 0         | 0         |
| 37,84         | 0         | 0         | 0         | 0         |
| 43,82         | 0         | 0         | 0         | 0         |
| 50,75         | 0         | 0         | 0         | 0         |
| 58,77         | 0         | 0         | 0         | 0         |
| 68,06         | 0         | 0         | 0         | 0         |
| 78,82         | 0         | 0         | 0         | 0         |
| 91,28         | 0         | 0         | 0         | 0         |
| 105,7         | 0         | 0         | 0         | 0         |
| 122,4         | 0         | 0         | 0         | 0         |
| 141,8         | 0         | 0         | 0         | 0         |
| 164,2         | 0         | 0         | 0         | 0         |
| 190,1         | 0         | 0         | 0         | 0         |
| 220,2         | 0         | 0         | 0         | 0         |
| 255           | 0         | 0         | 0         | 0         |
| 295,3         | 0         | 0         | 0         | 0         |
| 342           | 0         | 0         | 0         | 0         |
| 396,1         | 0         | 0         | 0         | 0         |
| 458,7         | 0         | 0         | 0         | 0         |

|       |   |   |   |   |
|-------|---|---|---|---|
| 531,2 | 0 | 0 | 0 | 0 |
| 615,1 | 0 | 0 | 0 | 0 |
| 712,4 | 0 | 0 | 0 | 0 |
| 825   | 0 | 0 | 0 | 0 |
| 955,4 | 0 | 0 | 0 | 0 |
| 1106  | 0 | 0 | 0 | 0 |
| 1281  | 0 | 0 | 0 | 0 |
| 1484  | 0 | 0 | 0 | 0 |
| 1718  | 0 | 0 | 0 | 0 |
| 1990  | 0 | 0 | 0 | 0 |
| 2305  | 0 | 0 | 0 | 0 |
| 2669  | 0 | 0 | 0 | 0 |
| 3091  | 0 | 0 | 0 | 0 |
| 3580  | 0 | 0 | 0 | 0 |
| 4145  | 0 | 0 | 0 | 0 |
| 4801  | 0 | 0 | 0 | 0 |
| 5560  | 0 | 0 | 0 | 0 |
| 6439  | 0 | 0 | 0 | 0 |
| 7456  | 0 | 0 | 0 | 0 |
| 8635  | 0 | 0 | 0 | 0 |
| 10000 | 0 | 0 | 0 | 0 |

**Table S15.** Percentage of hemolysis vs concentration for C12CholBr.

| Concentration (µg/mL) | Hemolysis (%) |
|-----------------------|---------------|
| 150                   | −0,69         |
| 300                   | −0,32         |
| 450                   | −0,77         |
| 600                   | −0,37         |
| 750                   | −0,21         |
| 900                   | 0,89          |
| 1050                  | 11,0          |
| 1200                  | 37,4          |
| 1350                  | 78,5          |
| 1500                  | 97,6          |
| 2500                  | 99,0          |

**Table S16.** Percentage of hemolysis vs concentration for C14CholBr.

| Concentration (µg/mL) | Hemolysis (%) |
|-----------------------|---------------|
| 12,5                  | 0,56          |
| 25                    | 0,82          |
| 37,5                  | 0,49          |
| 50                    | 0,65          |
| 62,5                  | 1,0           |
| 75                    | 5,2           |
| 87,5                  | 22,2          |
| 100                   | 74,9          |
| 112,5                 | 96,6          |
| 125                   | 94,2          |
| 250                   | 99,0          |

**Table S17.** Percentage of hemolysis vs concentration for C16CholBr.

| Concentration (µg/mL) | Hemolysis (%) |
|-----------------------|---------------|
| 5                     | 1,5           |
| 10                    | 2,7           |
| 20                    | 15,0          |
| 30                    | 65,0          |
| 40                    | 92,2          |
| 50                    | 99,3          |
| 60                    | 99,3          |
| 70                    | 100,4         |
| 80                    | 99,8          |
| 90                    | 98,0          |

## References

27. Garcia, M.T.; Ribosa, I.; Perez, L.; Manresa, A.; Comelles, F. Aggregation Behavior and Antimicrobial Activity of Ester-Functionalized Imidazolium- and Pyridinium-Based Ionic Liquids in Aqueous Solution. *Langmuir* **2013**, *29*, 2536–2545. <https://doi.org/10.1021/la304752e>.
